# Supplementary material for: Large-scale mapping of bioactive peptides in structural and sequence space
Source: PubMed Central journal article supplement (PMC5774755; doi:10.1371/journal.pone.0191063), 2018-01-19
Supplement: pone.0191063.s003.pdf [file pone.0191063.s003.pdf]

| CATH id      | Proteins | Percentage of proteins with assigned fold |
|--------------|----------|-------------------------------------------|
| 3.30.70.150  | 19543    | 33.5981                                   |
| 1.10.287.210 | 15978    | 27.4692                                   |
| 2.170.40.20  | 12388    | 21.2973                                   |
| 3.30.420.40  | 2989     | 5.1387                                    |
| 2.30.36.70   | 969      | 1.6659                                    |
| 1.10.490.10  | 884      | 1.5198                                    |
| 3.40.190.10  | 322      | 0.5536                                    |
| 2.60.40.720  | 313      | 0.5381                                    |
| 3.40.50.720  | 309      | 0.5312                                    |
| 2.60.120.10  | 246      | 0.4229                                    |
| 3.90.226.10  | 237      | 0.4074                                    |
| 3.40.50.300  | 215      | 0.3696                                    |
| 3.40.50.410  | 181      | 0.3112                                    |
| 2.60.40.10   | 161      | 0.2768                                    |
| 1.20.5.340   | 154      | 0.2648                                    |
| 1.10.530.10  | 151      | 0.2596                                    |
| 2.80.10.50   | 148      | 0.2544                                    |
| 3.40.50.150  | 144      | 0.2476                                    |
| 1.20.5.350   | 133      | 0.2287                                    |
| 3.20.20.80   | 126      | 0.2166                                    |
| 4.10.270.10  | 103      | 0.1771                                    |
| 3.30.1340.10 | 76       | 0.1307                                    |
| 1.10.2060.10 | 69       | 0.1186                                    |
| 3.50.7.10    | 65       | 0.1117                                    |
| 4.10.230.10  | 63       | 0.1083                                    |
| 3.50.50.60   | 56       | 0.0963                                    |
| 1.10.238.10  | 55       | 0.0946                                    |
| 3.40.50.200  | 53       | 0.0911                                    |
| 1.10.246.10  | 46       | 0.0791                                    |
| 3.40.50.2300 | 41       | 0.0705                                    |
| 2.30.29.30   | 40       | 0.0688                                    |
| 1.10.20.10   | 39       | 0.0670                                    |
| 1.10.565.10  | 39       | 0.0670                                    |
| 3.10.250.10  | 39       | 0.0670                                    |
| 3.80.10.10   | 39       | 0.0670                                    |
| 3.30.590.10  | 38       | 0.0653                                    |
| 3.30.200.20  | 36       | 0.0619                                    |
| 3.20.20.70   | 35       | 0.0602                                    |
| 1.10.510.10  | 33       | 0.0567                                    |
| 2.40.180.10  | 33       | 0.0567                                    |
| 2.30.39.10   | 32       | 0.0550                                    |
| 3.30.1330.10 | 32       | 0.0550                                    |
| 1.20.1070.10 | 31       | 0.0533                                    |
| 3.10.50.40   | 31       | 0.0533                                    |
| 2.40.128.20  | 30       | 0.0516                                    |
| 3.20.20.140  | 30       | 0.0516                                    |
| 3.30.365.10  | 29       | 0.0499                                    |
| 3.60.21.10   | 29       | 0.0499                                    |
| 3.40.640.10  | 28       | 0.0481                                    |
| 1.10.220.10  | 27       | 0.0464                                    |
| 2.60.120.290 | 26       | 0.0447                                    |
| 3.30.190.10  | 26       | 0.0447                                    |
| 3.40.50.2020 | 26       | 0.0447                                    |
| 3.30.360.10  | 25       | 0.0430                                    |
| 1.20.5.110   | 24       | 0.0413                                    |
| 1.20.58.70   | 24       | 0.0413                                    |

|               |    |        |
|---------------|----|--------|
| 3.40.50.1820  | 22 | 0.0378 |
| 1.20.5.170    | 21 | 0.0361 |
| 1.50.40.10    | 21 | 0.0361 |
| 3.30.930.10   | 20 | 0.0344 |
| 2.60.120.200  | 19 | 0.0327 |
| 1.10.540.10   | 18 | 0.0309 |
| 1.10.630.10   | 18 | 0.0309 |
| 3.20.20.120   | 17 | 0.0292 |
| 3.40.980.10   | 17 | 0.0292 |
| 3.40.50.1100  | 16 | 0.0275 |
| 3.40.366.10   | 16 | 0.0275 |
| 1.20.5.50     | 15 | 0.0258 |
| 1.50.30.10    | 15 | 0.0258 |
| 3.90.550.10   | 15 | 0.0258 |
| 1.10.10.10    | 14 | 0.0241 |
| 1.20.140.10   | 14 | 0.0241 |
| 3.40.50.800   | 14 | 0.0241 |
| 3.40.810.20   | 14 | 0.0241 |
| 4.10.372.10   | 14 | 0.0241 |
| 3.30.70.270   | 13 | 0.0223 |
| 3.40.50.880   | 13 | 0.0223 |
| 3.40.50.1970  | 13 | 0.0223 |
| 1.10.150.90   | 12 | 0.0206 |
| 3.10.450.10   | 12 | 0.0206 |
| 3.40.30.10    | 12 | 0.0206 |
| 3.40.50.620   | 12 | 0.0206 |
| 3.40.50.1240  | 12 | 0.0206 |
| 3.40.605.10   | 12 | 0.0206 |
| 2.40.10.10    | 11 | 0.0189 |
| 3.10.105.10   | 11 | 0.0189 |
| 3.15.10.10    | 11 | 0.0189 |
| 3.40.309.10   | 11 | 0.0189 |
| 3.90.870.10   | 11 | 0.0189 |
| 3.30.450.90   | 10 | 0.0172 |
| 3.30.565.10   | 10 | 0.0172 |
| 3.40.50.970   | 10 | 0.0172 |
| 3.40.630.10   | 10 | 0.0172 |
| 3.40.1190.20  | 10 | 0.0172 |
| 1.10.3720.10  | 9  | 0.0155 |
| 1.25.10.10    | 9  | 0.0155 |
| 3.10.310.10   | 9  | 0.0155 |
| 3.30.260.10   | 9  | 0.0155 |
| 3.40.850.10   | 9  | 0.0155 |
| 3.90.1300.10  | 9  | 0.0155 |
| 2.30.30.310   | 8  | 0.0138 |
| 2.40.50.140   | 8  | 0.0138 |
| 3.20.20.300   | 8  | 0.0138 |
| 3.30.497.10   | 8  | 0.0138 |
| 3.30.950.10   | 8  | 0.0138 |
| 3.40.50.80    | 8  | 0.0138 |
| 3.40.50.670   | 8  | 0.0138 |
| 3.40.1190.10  | 8  | 0.0138 |
| 1.10.580.10   | 7  | 0.0120 |
| 1.20.1560.10  | 7  | 0.0120 |
| 2.40.170.20   | 7  | 0.0120 |
| 3.30.450.20   | 7  | 0.0120 |
| 3.30.470.20   | 7  | 0.0120 |
| 3.40.50.10470 | 7  | 0.0120 |

|               |   |        |
|---------------|---|--------|
| 3.40.710.10   | 7 | 0.0120 |
| 3.90.1150.10  | 7 | 0.0120 |
| 1.10.3080.10  | 6 | 0.0103 |
| 1.20.1050.10  | 6 | 0.0103 |
| 1.20.1050.60  | 6 | 0.0103 |
| 2.130.10.10   | 6 | 0.0103 |
| 3.20.20.30    | 6 | 0.0103 |
| 4.10.70.10    | 6 | 0.0103 |
| 1.10.560.10   | 5 | 0.0086 |
| 3.10.20.90    | 5 | 0.0086 |
| 3.20.19.10    | 5 | 0.0086 |
| 3.20.20.60    | 5 | 0.0086 |
| 3.30.420.10   | 5 | 0.0086 |
| 3.40.109.10   | 5 | 0.0086 |
| 3.40.1410.10  | 5 | 0.0086 |
| 3.90.180.10   | 5 | 0.0086 |
| 1.10.8.60     | 4 | 0.0069 |
| 1.10.220.20   | 4 | 0.0069 |
| 1.10.600.10   | 4 | 0.0069 |
| 2.30.30.190   | 4 | 0.0069 |
| 3.10.540.10   | 4 | 0.0069 |
| 3.20.20.100   | 4 | 0.0069 |
| 3.30.60.10    | 4 | 0.0069 |
| 3.30.559.10   | 4 | 0.0069 |
| 3.30.1060.10  | 4 | 0.0069 |
| 3.40.47.10    | 4 | 0.0069 |
| 3.40.50.170   | 4 | 0.0069 |
| 3.40.50.10540 | 4 | 0.0069 |
| 3.40.367.20   | 4 | 0.0069 |
| 3.40.600.10   | 4 | 0.0069 |
| 3.60.15.10    | 4 | 0.0069 |
| 3.60.20.10    | 4 | 0.0069 |
| 3.90.190.10   | 4 | 0.0069 |
| 3.90.245.10   | 4 | 0.0069 |
| 1.10.120.10   | 3 | 0.0052 |
| 1.10.468.10   | 3 | 0.0052 |
| 1.10.760.10   | 3 | 0.0052 |
| 1.25.40.10    | 3 | 0.0052 |
| 1.50.10.100   | 3 | 0.0052 |
| 2.30.110.10   | 3 | 0.0052 |
| 2.40.33.10    | 3 | 0.0052 |
| 2.160.20.10   | 3 | 0.0052 |
| 2.170.120.12  | 3 | 0.0052 |
| 3.10.129.10   | 3 | 0.0052 |
| 3.10.580.10   | 3 | 0.0052 |
| 3.20.20.330   | 3 | 0.0052 |
| 3.30.300.20   | 3 | 0.0052 |
| 3.40.50.980   | 3 | 0.0052 |
| 3.40.50.1360  | 3 | 0.0052 |
| 3.40.50.1400  | 3 | 0.0052 |
| 3.40.50.1980  | 3 | 0.0052 |
| 3.40.50.2000  | 3 | 0.0052 |
| 3.40.470.10   | 3 | 0.0052 |
| 3.40.630.20   | 3 | 0.0052 |
| 3.40.1030.10  | 3 | 0.0052 |
| 3.40.1280.10  | 3 | 0.0052 |
| 3.60.40.10    | 3 | 0.0052 |
| 3.90.190.20   | 3 | 0.0052 |

|              |   |        |
|--------------|---|--------|
| 3.90.1510.10 | 3 | 0.0052 |
| 1.10.8.280   | 2 | 0.0034 |
| 1.10.290.10  | 2 | 0.0034 |
| 1.10.520.10  | 2 | 0.0034 |
| 1.10.860.10  | 2 | 0.0034 |
| 1.10.1200.10 | 2 | 0.0034 |
| 1.10.3470.10 | 2 | 0.0034 |
| 1.20.120.80  | 2 | 0.0034 |
| 1.20.200.10  | 2 | 0.0034 |
| 1.20.210.10  | 2 | 0.0034 |
| 1.20.810.10  | 2 | 0.0034 |
| 1.20.1610.10 | 2 | 0.0034 |
| 2.30.38.10   | 2 | 0.0034 |
| 2.40.30.10   | 2 | 0.0034 |
| 2.40.160.60  | 2 | 0.0034 |
| 2.60.40.820  | 2 | 0.0034 |
| 2.60.300.12  | 2 | 0.0034 |
| 2.70.98.10   | 2 | 0.0034 |
| 2.140.10.10  | 2 | 0.0034 |
| 2.140.10.30  | 2 | 0.0034 |
| 3.20.20.210  | 2 | 0.0034 |
| 3.20.20.240  | 2 | 0.0034 |
| 3.20.20.370  | 2 | 0.0034 |
| 3.30.70.330  | 2 | 0.0034 |
| 3.30.70.930  | 2 | 0.0034 |
| 3.30.230.40  | 2 | 0.0034 |
| 3.30.300.30  | 2 | 0.0034 |
| 3.30.428.10  | 2 | 0.0034 |
| 3.30.450.80  | 2 | 0.0034 |
| 3.30.1130.10 | 2 | 0.0034 |
| 3.30.1360.30 | 2 | 0.0034 |
| 3.40.718.10  | 2 | 0.0034 |
| 3.40.720.10  | 2 | 0.0034 |
| 3.60.110.10  | 2 | 0.0034 |
| 3.90.110.10  | 2 | 0.0034 |
| 3.90.700.10  | 2 | 0.0034 |
| 1.10.10.670  | 1 | 0.0017 |
| 1.10.150.20  | 1 | 0.0017 |
| 1.10.287.110 | 1 | 0.0017 |
| 1.10.340.30  | 1 | 0.0017 |
| 1.10.357.10  | 1 | 0.0017 |
| 1.10.400.20  | 1 | 0.0017 |
| 1.10.405.10  | 1 | 0.0017 |
| 1.10.420.10  | 1 | 0.0017 |
| 1.10.601.10  | 1 | 0.0017 |
| 1.10.1000.11 | 1 | 0.0017 |
| 1.10.1030.10 | 1 | 0.0017 |
| 1.10.1280.10 | 1 | 0.0017 |
| 1.10.1500.10 | 1 | 0.0017 |
| 1.10.1670.10 | 1 | 0.0017 |
| 1.10.1750.10 | 1 | 0.0017 |
| 1.10.1780.10 | 1 | 0.0017 |
| 1.10.1900.10 | 1 | 0.0017 |
| 1.10.1900.20 | 1 | 0.0017 |
| 1.10.3150.10 | 1 | 0.0017 |
| 1.10.3370.10 | 1 | 0.0017 |
| 1.10.3860.10 | 1 | 0.0017 |
| 1.20.120.330 | 1 | 0.0017 |

|              |   |        |
|--------------|---|--------|
| 1.20.990.10  | 1 | 0.0017 |
| 1.20.1260.10 | 1 | 0.0017 |
| 1.20.1340.10 | 1 | 0.0017 |
| 1.20.1370.10 | 1 | 0.0017 |
| 1.20.1600.10 | 1 | 0.0017 |
| 1.25.40.20   | 1 | 0.0017 |
| 1.25.40.90   | 1 | 0.0017 |
| 2.10.110.10  | 1 | 0.0017 |
| 2.30.30.110  | 1 | 0.0017 |
| 2.40.10.170  | 1 | 0.0017 |
| 2.40.40.20   | 1 | 0.0017 |
| 2.40.128.130 | 1 | 0.0017 |
| 2.40.160.50  | 1 | 0.0017 |
| 2.40.270.10  | 1 | 0.0017 |
| 2.50.20.10   | 1 | 0.0017 |
| 2.60.15.10   | 1 | 0.0017 |
| 2.60.20.30   | 1 | 0.0017 |
| 2.60.40.200  | 1 | 0.0017 |
| 2.60.40.320  | 1 | 0.0017 |
| 2.60.40.340  | 1 | 0.0017 |
| 2.60.40.1360 | 1 | 0.0017 |
| 2.60.120.20  | 1 | 0.0017 |
| 2.60.120.260 | 1 | 0.0017 |
| 2.60.120.590 | 1 | 0.0017 |
| 2.60.200.30  | 1 | 0.0017 |
| 2.60.260.20  | 1 | 0.0017 |
| 2.70.10.10   | 1 | 0.0017 |
| 2.70.210.12  | 1 | 0.0017 |
| 2.140.10.20  | 1 | 0.0017 |
| 2.160.10.10  | 1 | 0.0017 |
| 3.10.20.30   | 1 | 0.0017 |
| 3.10.110.10  | 1 | 0.0017 |
| 3.10.200.10  | 1 | 0.0017 |
| 3.10.400.10  | 1 | 0.0017 |
| 3.10.450.40  | 1 | 0.0017 |
| 3.20.20.10   | 1 | 0.0017 |
| 3.20.20.20   | 1 | 0.0017 |
| 3.20.20.150  | 1 | 0.0017 |
| 3.20.20.190  | 1 | 0.0017 |
| 3.20.20.410  | 1 | 0.0017 |
| 3.20.20.450  | 1 | 0.0017 |
| 3.30.9.10    | 1 | 0.0017 |
| 3.30.70.370  | 1 | 0.0017 |
| 3.30.70.580  | 1 | 0.0017 |
| 3.30.70.600  | 1 | 0.0017 |
| 3.30.70.890  | 1 | 0.0017 |
| 3.30.70.1230 | 1 | 0.0017 |
| 3.30.230.10  | 1 | 0.0017 |
| 3.30.230.60  | 1 | 0.0017 |
| 3.30.230.70  | 1 | 0.0017 |
| 3.30.379.10  | 1 | 0.0017 |
| 3.30.420.100 | 1 | 0.0017 |
| 3.30.420.140 | 1 | 0.0017 |
| 3.30.429.10  | 1 | 0.0017 |
| 3.30.450.30  | 1 | 0.0017 |
| 3.30.470.10  | 1 | 0.0017 |
| 3.30.479.20  | 1 | 0.0017 |
| 3.30.530.20  | 1 | 0.0017 |

|               |   |        |
|---------------|---|--------|
| 3.30.830.10   | 1 | 0.0017 |
| 3.30.870.10   | 1 | 0.0017 |
| 3.30.990.10   | 1 | 0.0017 |
| 3.30.1120.10  | 1 | 0.0017 |
| 3.30.1330.40  | 1 | 0.0017 |
| 3.30.1370.60  | 1 | 0.0017 |
| 3.30.1490.10  | 1 | 0.0017 |
| 3.30.2080.10  | 1 | 0.0017 |
| 3.40.33.10    | 1 | 0.0017 |
| 3.40.50.180   | 1 | 0.0017 |
| 3.40.50.360   | 1 | 0.0017 |
| 3.40.50.790   | 1 | 0.0017 |
| 3.40.50.960   | 1 | 0.0017 |
| 3.40.50.1000  | 1 | 0.0017 |
| 3.40.50.1470  | 1 | 0.0017 |
| 3.40.50.1580  | 1 | 0.0017 |
| 3.40.50.1860  | 1 | 0.0017 |
| 3.40.50.2030  | 1 | 0.0017 |
| 3.40.50.10190 | 1 | 0.0017 |
| 3.40.50.10260 | 1 | 0.0017 |
| 3.40.50.10320 | 1 | 0.0017 |
| 3.40.50.10490 | 1 | 0.0017 |
| 3.40.192.10   | 1 | 0.0017 |
| 3.40.225.10   | 1 | 0.0017 |
| 3.40.630.30   | 1 | 0.0017 |
| 3.40.800.10   | 1 | 0.0017 |
| 3.40.950.10   | 1 | 0.0017 |
| 3.40.1110.10  | 1 | 0.0017 |
| 3.50.30.10    | 1 | 0.0017 |
| 3.50.30.50    | 1 | 0.0017 |
| 3.60.70.12    | 1 | 0.0017 |
| 3.60.120.10   | 1 | 0.0017 |
| 3.60.130.10   | 1 | 0.0017 |
| 3.90.25.10    | 1 | 0.0017 |
| 3.90.45.10    | 1 | 0.0017 |
| 3.90.215.10   | 1 | 0.0017 |
| 3.90.230.10   | 1 | 0.0017 |
| 3.90.260.10   | 1 | 0.0017 |
| 3.90.420.10   | 1 | 0.0017 |
| 3.90.740.10   | 1 | 0.0017 |
| 3.90.800.10   | 1 | 0.0017 |
| 3.90.920.10   | 1 | 0.0017 |
| 3.90.950.10   | 1 | 0.0017 |
| 3.90.960.10   | 1 | 0.0017 |
| 4.10.410.10   | 1 | 0.0017 |
