# Supplementary material for: Large-scale mapping of bioactive peptides in structural and sequence space
Source: PubMed Central journal article supplement (PMC5774755; doi:10.1371/journal.pone.0191063), 2018-01-19
Supplement: pone.0191063.s004.pdf [file pone.0191063.s004.pdf]

| CATH         | Proteins | Percentage of proteins<br>with assigned fold | Number of BP |
|--------------|----------|----------------------------------------------|--------------|
| 3.40.50.300  | 215      | 0.370                                        | 35           |
| 3.40.50.720  | 309      | 0.531                                        | 25           |
| 3.20.20.70   | 35       | 0.060                                        | 18           |
| 2.60.120.10  | 246      | 0.423                                        | 17           |
| 3.40.50.1820 | 22       | 0.038                                        | 17           |
| 3.20.20.80   | 126      | 0.217                                        | 13           |
| 3.40.50.150  | 144      | 0.248                                        | 12           |
| 3.50.50.60   | 56       | 0.096                                        | 10           |
| 3.90.226.10  | 237      | 0.407                                        | 9            |
| 1.10.630.10  | 18       | 0.031                                        | 9            |
| 3.40.190.10  | 322      | 0.554                                        | 8            |
| 2.60.40.10   | 161      | 0.277                                        | 8            |
| 1.10.530.10  | 151      | 0.260                                        | 8            |
| 3.40.50.200  | 53       | 0.091                                        | 8            |
| 3.40.50.2300 | 41       | 0.070                                        | 8            |
| 3.40.640.10  | 28       | 0.048                                        | 8            |
| 3.40.50.620  | 12       | 0.021                                        | 8            |
| 3.30.420.40  | 2989     | 5.139                                        | 7            |
| 3.40.605.10  | 12       | 0.021                                        | 7            |
| 2.40.50.140  | 8        | 0.014                                        | 7            |
| 3.20.20.30   | 6        | 0.010                                        | 7            |
| 3.80.10.10   | 39       | 0.067                                        | 6            |
| 1.10.510.10  | 33       | 0.057                                        | 6            |
| 3.30.930.10  | 20       | 0.034                                        | 6            |
| 3.40.30.10   | 12       | 0.021                                        | 6            |
| 1.10.490.10  | 884      | 1.520                                        | 5            |
| 2.80.10.50   | 148      | 0.254                                        | 5            |
| 3.30.200.20  | 36       | 0.062                                        | 5            |
| 2.40.128.20  | 30       | 0.052                                        | 5            |
| 3.20.20.140  | 30       | 0.052                                        | 5            |
| 3.40.50.880  | 13       | 0.022                                        | 5            |
| 3.40.1190.20 | 10       | 0.017                                        | 5            |
| 3.40.630.10  | 10       | 0.017                                        | 5            |
| 3.40.50.80   | 8        | 0.014                                        | 5            |
| 3.40.710.10  | 7        | 0.012                                        | 5            |
| 3.30.420.10  | 5        | 0.009                                        | 5            |
| 1.10.565.10  | 39       | 0.067                                        | 4            |
| 2.30.39.10   | 32       | 0.055                                        | 4            |
| 1.20.1070.10 | 31       | 0.053                                        | 4            |
| 3.60.21.10   | 29       | 0.050                                        | 4            |
| 3.40.50.1970 | 13       | 0.022                                        | 4            |
| 2.40.10.10   | 11       | 0.019                                        | 4            |
| 3.40.309.10  | 11       | 0.019                                        | 4            |
| 3.30.565.10  | 10       | 0.017                                        | 4            |
| 3.40.50.970  | 10       | 0.017                                        | 4            |
| 1.10.3720.10 | 9        | 0.015                                        | 4            |
| 3.10.310.10  | 9        | 0.015                                        | 4            |
| 3.90.1300.10 | 9        | 0.015                                        | 4            |
| 1.20.1560.10 | 7        | 0.012                                        | 4            |
| 2.40.170.20  | 7        | 0.012                                        | 4            |
| 3.20.20.60   | 5        | 0.009                                        | 4            |
| 1.10.8.60    | 4        | 0.007                                        | 4            |
| 3.40.47.10   | 4        | 0.007                                        | 4            |
| 3.60.15.10   | 4        | 0.007                                        | 4            |
| 4.10.230.10  | 63       | 0.108                                        | 3            |
| 1.10.238.10  | 55       | 0.095                                        | 3            |
| 3.10.250.10  | 39       | 0.067                                        | 3            |
| 3.10.50.40   | 31       | 0.053                                        | 3            |
| 3.30.365.10  | 29       | 0.050                                        | 3            |
| 3.40.50.2020 | 26       | 0.045                                        | 3            |
| 3.40.980.10  | 17       | 0.029                                        | 3            |
| 3.90.550.10  | 15       | 0.026                                        | 3            |
| 1.10.10.10   | 14       | 0.024                                        | 3            |
| 3.10.450.10  | 12       | 0.021                                        | 3            |
| 3.40.50.1240 | 12       | 0.021                                        | 3            |
| 3.20.20.300  | 8        | 0.014                                        | 3            |
| 3.40.1190.10 | 8        | 0.014                                        | 3            |
| 3.30.450.20  | 7        | 0.012                                        | 3            |
| 3.30.470.20  | 7        | 0.012                                        | 3            |

|               |       |        |   |
|---------------|-------|--------|---|
| 3.90.1150.10  | 7     | 0.012  | 3 |
| 2.130.10.10   | 6     | 0.010  | 3 |
| 4.10.70.10    | 6     | 0.010  | 3 |
| 3.40.109.10   | 5     | 0.009  | 3 |
| 3.90.180.10   | 5     | 0.009  | 3 |
| 3.40.50.170   | 4     | 0.007  | 3 |
| 3.60.20.10    | 4     | 0.007  | 3 |
| 3.90.190.10   | 4     | 0.007  | 3 |
| 1.10.760.10   | 3     | 0.005  | 3 |
| 1.25.40.10    | 3     | 0.005  | 3 |
| 3.40.1280.10  | 3     | 0.005  | 3 |
| 3.40.50.1360  | 3     | 0.005  | 3 |
| 3.40.50.1980  | 3     | 0.005  | 3 |
| 2.60.120.20   | 1     | 0.002  | 3 |
| 3.20.20.10    | 1     | 0.002  | 3 |
| 2.170.40.20   | 12388 | 21.297 | 2 |
| 2.60.40.720   | 313   | 0.538  | 2 |
| 3.30.1340.10  | 76    | 0.131  | 2 |
| 3.50.7.10     | 65    | 0.112  | 2 |
| 1.10.246.10   | 46    | 0.079  | 2 |
| 3.30.1330.10  | 32    | 0.055  | 2 |
| 3.30.360.10   | 25    | 0.043  | 2 |
| 1.20.5.110    | 24    | 0.041  | 2 |
| 1.20.58.70    | 24    | 0.041  | 2 |
| 1.50.40.10    | 21    | 0.036  | 2 |
| 2.60.120.200  | 19    | 0.033  | 2 |
| 3.20.20.120   | 17    | 0.029  | 2 |
| 3.40.50.1100  | 16    | 0.028  | 2 |
| 3.40.810.20   | 14    | 0.024  | 2 |
| 3.30.70.270   | 13    | 0.022  | 2 |
| 3.10.105.10   | 11    | 0.019  | 2 |
| 3.90.870.10   | 11    | 0.019  | 2 |
| 3.30.450.90   | 10    | 0.017  | 2 |
| 1.25.10.10    | 9     | 0.015  | 2 |
| 3.40.850.10   | 9     | 0.015  | 2 |
| 3.30.497.10   | 8     | 0.014  | 2 |
| 1.10.3080.10  | 6     | 0.010  | 2 |
| 1.20.1050.10  | 6     | 0.010  | 2 |
| 1.10.560.10   | 5     | 0.009  | 2 |
| 1.10.600.10   | 4     | 0.007  | 2 |
| 3.20.20.100   | 4     | 0.007  | 2 |
| 3.30.1060.10  | 4     | 0.007  | 2 |
| 3.40.50.10540 | 4     | 0.007  | 2 |
| 3.90.245.10   | 4     | 0.007  | 2 |
| 2.30.110.10   | 3     | 0.005  | 2 |
| 3.10.129.10   | 3     | 0.005  | 2 |
| 3.20.20.330   | 3     | 0.005  | 2 |
| 3.30.300.20   | 3     | 0.005  | 2 |
| 3.40.1030.10  | 3     | 0.005  | 2 |
| 3.40.50.2000  | 3     | 0.005  | 2 |
| 3.40.50.980   | 3     | 0.005  | 2 |
| 3.40.630.20   | 3     | 0.005  | 2 |
| 3.60.40.10    | 3     | 0.005  | 2 |
| 1.10.290.10   | 2     | 0.003  | 2 |
| 1.10.3470.10  | 2     | 0.003  | 2 |
| 1.10.520.10   | 2     | 0.003  | 2 |
| 1.20.120.80   | 2     | 0.003  | 2 |
| 1.20.210.10   | 2     | 0.003  | 2 |
| 1.20.810.10   | 2     | 0.003  | 2 |
| 2.40.30.10    | 2     | 0.003  | 2 |
| 2.60.40.820   | 2     | 0.003  | 2 |
| 2.70.98.10    | 2     | 0.003  | 2 |
| 3.20.20.240   | 2     | 0.003  | 2 |
| 3.20.20.370   | 2     | 0.003  | 2 |
| 3.30.1360.30  | 2     | 0.003  | 2 |
| 3.30.300.30   | 2     | 0.003  | 2 |
| 2.50.20.10    | 1     | 0.002  | 2 |
| 3.30.70.150   | 19543 | 33.598 | 1 |
| 1.10.287.210  | 15978 | 27.469 | 1 |
| 2.30.36.70    | 969   | 1.666  | 1 |
| 3.40.50.410   | 181   | 0.311  | 1 |
| 1.20.5.340    | 154   | 0.265  | 1 |

|               |     |       |   |
|---------------|-----|-------|---|
| 1.20.5.350    | 133 | 0.229 | 1 |
| 4.10.270.10   | 103 | 0.177 | 1 |
| 1.10.2060.10  | 69  | 0.119 | 1 |
| 2.30.29.30    | 40  | 0.069 | 1 |
| 1.10.20.10    | 39  | 0.067 | 1 |
| 3.30.590.10   | 38  | 0.065 | 1 |
| 2.40.180.10   | 33  | 0.057 | 1 |
| 1.10.220.10   | 27  | 0.046 | 1 |
| 2.60.120.290  | 26  | 0.045 | 1 |
| 3.30.190.10   | 26  | 0.045 | 1 |
| 1.20.5.170    | 21  | 0.036 | 1 |
| 1.10.540.10   | 18  | 0.031 | 1 |
| 3.40.366.10   | 16  | 0.028 | 1 |
| 1.20.5.50     | 15  | 0.026 | 1 |
| 1.50.30.10    | 15  | 0.026 | 1 |
| 1.20.140.10   | 14  | 0.024 | 1 |
| 3.40.50.800   | 14  | 0.024 | 1 |
| 4.10.372.10   | 14  | 0.024 | 1 |
| 1.10.150.90   | 12  | 0.021 | 1 |
| 3.15.10.10    | 11  | 0.019 | 1 |
| 3.30.260.10   | 9   | 0.015 | 1 |
| 2.30.30.310   | 8   | 0.014 | 1 |
| 3.30.950.10   | 8   | 0.014 | 1 |
| 3.40.50.670   | 8   | 0.014 | 1 |
| 1.10.580.10   | 7   | 0.012 | 1 |
| 3.40.50.10470 | 7   | 0.012 | 1 |
| 1.20.1050.60  | 6   | 0.010 | 1 |
| 3.10.20.90    | 5   | 0.009 | 1 |
| 3.20.19.10    | 5   | 0.009 | 1 |
| 3.40.1410.10  | 5   | 0.009 | 1 |
| 1.10.220.20   | 4   | 0.007 | 1 |
| 2.30.30.190   | 4   | 0.007 | 1 |
| 3.10.540.10   | 4   | 0.007 | 1 |
| 3.30.559.10   | 4   | 0.007 | 1 |
| 3.30.60.10    | 4   | 0.007 | 1 |
| 3.40.367.20   | 4   | 0.007 | 1 |
| 3.40.600.10   | 4   | 0.007 | 1 |
| 1.10.120.10   | 3   | 0.005 | 1 |
| 1.10.468.10   | 3   | 0.005 | 1 |
| 1.50.10.100   | 3   | 0.005 | 1 |
| 2.160.20.10   | 3   | 0.005 | 1 |
| 2.170.120.12  | 3   | 0.005 | 1 |
| 2.40.33.10    | 3   | 0.005 | 1 |
| 3.10.580.10   | 3   | 0.005 | 1 |
| 3.40.470.10   | 3   | 0.005 | 1 |
| 3.40.50.1400  | 3   | 0.005 | 1 |
| 3.90.1510.10  | 3   | 0.005 | 1 |
| 3.90.190.20   | 3   | 0.005 | 1 |
| 1.10.1200.10  | 2   | 0.003 | 1 |
| 1.10.8.280    | 2   | 0.003 | 1 |
| 1.10.860.10   | 2   | 0.003 | 1 |
| 1.20.1610.10  | 2   | 0.003 | 1 |
| 1.20.200.10   | 2   | 0.003 | 1 |
| 2.140.10.10   | 2   | 0.003 | 1 |
| 2.140.10.30   | 2   | 0.003 | 1 |
| 2.30.38.10    | 2   | 0.003 | 1 |
| 2.40.160.60   | 2   | 0.003 | 1 |
| 2.60.300.12   | 2   | 0.003 | 1 |
| 3.20.20.210   | 2   | 0.003 | 1 |
| 3.30.1130.10  | 2   | 0.003 | 1 |
| 3.30.230.40   | 2   | 0.003 | 1 |
| 3.30.428.10   | 2   | 0.003 | 1 |
| 3.30.450.80   | 2   | 0.003 | 1 |
| 3.30.70.330   | 2   | 0.003 | 1 |
| 3.30.70.930   | 2   | 0.003 | 1 |
| 3.40.718.10   | 2   | 0.003 | 1 |
| 3.40.720.10   | 2   | 0.003 | 1 |
| 3.60.110.10   | 2   | 0.003 | 1 |
| 3.90.110.10   | 2   | 0.003 | 1 |
| 3.90.700.10   | 2   | 0.003 | 1 |
| 1.10.10.670   | 1   | 0.002 | 1 |
| 1.10.1000.11  | 1   | 0.002 | 1 |

|              |   |       |   |
|--------------|---|-------|---|
| 1.10.1030.10 | 1 | 0.002 | 1 |
| 1.10.1280.10 | 1 | 0.002 | 1 |
| 1.10.150.20  | 1 | 0.002 | 1 |
| 1.10.1500.10 | 1 | 0.002 | 1 |
| 1.10.1670.10 | 1 | 0.002 | 1 |
| 1.10.1750.10 | 1 | 0.002 | 1 |
| 1.10.1780.10 | 1 | 0.002 | 1 |
| 1.10.1900.10 | 1 | 0.002 | 1 |
| 1.10.1900.20 | 1 | 0.002 | 1 |
| 1.10.287.110 | 1 | 0.002 | 1 |
| 1.10.3150.10 | 1 | 0.002 | 1 |
| 1.10.3370.10 | 1 | 0.002 | 1 |
| 1.10.340.30  | 1 | 0.002 | 1 |
| 1.10.357.10  | 1 | 0.002 | 1 |
| 1.10.3860.10 | 1 | 0.002 | 1 |
| 1.10.400.20  | 1 | 0.002 | 1 |
| 1.10.405.10  | 1 | 0.002 | 1 |
| 1.10.420.10  | 1 | 0.002 | 1 |
| 1.10.601.10  | 1 | 0.002 | 1 |
| 1.20.120.330 | 1 | 0.002 | 1 |
| 1.20.1260.10 | 1 | 0.002 | 1 |
| 1.20.1340.10 | 1 | 0.002 | 1 |
| 1.20.1370.10 | 1 | 0.002 | 1 |
| 1.20.1600.10 | 1 | 0.002 | 1 |
| 1.20.990.10  | 1 | 0.002 | 1 |
| 1.25.40.20   | 1 | 0.002 | 1 |
| 1.25.40.90   | 1 | 0.002 | 1 |
| 2.10.110.10  | 1 | 0.002 | 1 |
| 2.140.10.20  | 1 | 0.002 | 1 |
| 2.160.10.10  | 1 | 0.002 | 1 |
| 2.30.30.110  | 1 | 0.002 | 1 |
| 2.40.10.170  | 1 | 0.002 | 1 |
| 2.40.128.130 | 1 | 0.002 | 1 |
| 2.40.160.50  | 1 | 0.002 | 1 |
| 2.40.270.10  | 1 | 0.002 | 1 |
| 2.40.40.20   | 1 | 0.002 | 1 |
| 2.60.120.260 | 1 | 0.002 | 1 |
| 2.60.120.590 | 1 | 0.002 | 1 |
| 2.60.15.10   | 1 | 0.002 | 1 |
| 2.60.20.30   | 1 | 0.002 | 1 |
| 2.60.200.30  | 1 | 0.002 | 1 |
| 2.60.260.20  | 1 | 0.002 | 1 |
| 2.60.40.1360 | 1 | 0.002 | 1 |
| 2.60.40.200  | 1 | 0.002 | 1 |
| 2.60.40.320  | 1 | 0.002 | 1 |
| 2.60.40.340  | 1 | 0.002 | 1 |
| 2.70.10.10   | 1 | 0.002 | 1 |
| 2.70.210.12  | 1 | 0.002 | 1 |
| 3.10.110.10  | 1 | 0.002 | 1 |
| 3.10.20.30   | 1 | 0.002 | 1 |
| 3.10.200.10  | 1 | 0.002 | 1 |
| 3.10.400.10  | 1 | 0.002 | 1 |
| 3.10.450.40  | 1 | 0.002 | 1 |
| 3.20.20.150  | 1 | 0.002 | 1 |
| 3.20.20.190  | 1 | 0.002 | 1 |
| 3.20.20.20   | 1 | 0.002 | 1 |
| 3.20.20.410  | 1 | 0.002 | 1 |
| 3.20.20.450  | 1 | 0.002 | 1 |
| 3.30.1120.10 | 1 | 0.002 | 1 |
| 3.30.1330.40 | 1 | 0.002 | 1 |
| 3.30.1370.60 | 1 | 0.002 | 1 |
| 3.30.1490.10 | 1 | 0.002 | 1 |
| 3.30.2080.10 | 1 | 0.002 | 1 |
| 3.30.230.10  | 1 | 0.002 | 1 |
| 3.30.230.60  | 1 | 0.002 | 1 |
| 3.30.230.70  | 1 | 0.002 | 1 |
| 3.30.379.10  | 1 | 0.002 | 1 |
| 3.30.420.100 | 1 | 0.002 | 1 |
| 3.30.420.140 | 1 | 0.002 | 1 |
| 3.30.429.10  | 1 | 0.002 | 1 |
| 3.30.450.30  | 1 | 0.002 | 1 |
| 3.30.470.10  | 1 | 0.002 | 1 |

|               |   |       |   |
|---------------|---|-------|---|
| 3.30.479.20   | 1 | 0.002 | 1 |
| 3.30.530.20   | 1 | 0.002 | 1 |
| 3.30.70.1230  | 1 | 0.002 | 1 |
| 3.30.70.370   | 1 | 0.002 | 1 |
| 3.30.70.580   | 1 | 0.002 | 1 |
| 3.30.70.600   | 1 | 0.002 | 1 |
| 3.30.70.890   | 1 | 0.002 | 1 |
| 3.30.830.10   | 1 | 0.002 | 1 |
| 3.30.870.10   | 1 | 0.002 | 1 |
| 3.30.9.10     | 1 | 0.002 | 1 |
| 3.30.990.10   | 1 | 0.002 | 1 |
| 3.40.1110.10  | 1 | 0.002 | 1 |
| 3.40.192.10   | 1 | 0.002 | 1 |
| 3.40.225.10   | 1 | 0.002 | 1 |
| 3.40.33.10    | 1 | 0.002 | 1 |
| 3.40.50.1000  | 1 | 0.002 | 1 |
| 3.40.50.10190 | 1 | 0.002 | 1 |
| 3.40.50.10260 | 1 | 0.002 | 1 |
| 3.40.50.10320 | 1 | 0.002 | 1 |
| 3.40.50.10490 | 1 | 0.002 | 1 |
| 3.40.50.1470  | 1 | 0.002 | 1 |
| 3.40.50.1580  | 1 | 0.002 | 1 |
| 3.40.50.180   | 1 | 0.002 | 1 |
| 3.40.50.1860  | 1 | 0.002 | 1 |
| 3.40.50.2030  | 1 | 0.002 | 1 |
| 3.40.50.360   | 1 | 0.002 | 1 |
| 3.40.50.790   | 1 | 0.002 | 1 |
| 3.40.50.960   | 1 | 0.002 | 1 |
| 3.40.630.30   | 1 | 0.002 | 1 |
| 3.40.800.10   | 1 | 0.002 | 1 |
| 3.40.950.10   | 1 | 0.002 | 1 |
| 3.50.30.10    | 1 | 0.002 | 1 |
| 3.50.30.50    | 1 | 0.002 | 1 |
| 3.60.120.10   | 1 | 0.002 | 1 |
| 3.60.130.10   | 1 | 0.002 | 1 |
| 3.60.70.12    | 1 | 0.002 | 1 |
| 3.90.215.10   | 1 | 0.002 | 1 |
| 3.90.230.10   | 1 | 0.002 | 1 |
| 3.90.25.10    | 1 | 0.002 | 1 |
| 3.90.260.10   | 1 | 0.002 | 1 |
| 3.90.420.10   | 1 | 0.002 | 1 |
| 3.90.45.10    | 1 | 0.002 | 1 |
| 3.90.740.10   | 1 | 0.002 | 1 |
| 3.90.800.10   | 1 | 0.002 | 1 |
| 3.90.920.10   | 1 | 0.002 | 1 |
| 3.90.950.10   | 1 | 0.002 | 1 |
| 3.90.960.10   | 1 | 0.002 | 1 |
| 4.10.410.10   | 1 | 0.002 | 1 |
